1 **The effects of intermittent or continuous exercise on renal haemodynamics during moderate-**  
2 **intensity exercise**

3 Shotaro Kawakami<sup>1,2,3</sup>, Tetsuhiko Yasuno<sup>4</sup>, Saki Kawakami<sup>3</sup>, Ai Ito<sup>3</sup>, Kanta Fujimi<sup>5</sup>, Takuro Matsuda<sup>5</sup>,  
4 Shihoko Nakashima<sup>2,3</sup>, Kosuke Masutani<sup>4</sup>, Yoshinari Uehara<sup>2,3</sup>, Yasuki Higaki<sup>2,3</sup>, Ryoma Michishita<sup>2,3,\*</sup>

5 <sup>1</sup> Graduate School of Sports and Health Science, Fukuoka University, Fukuoka, Japan

6 <sup>2</sup> Faculty of Sports and Health Science, Fukuoka University, Fukuoka, Japan

7 <sup>3</sup> The Fukuoka University Institute for Physical Activity, Fukuoka, Japan

8 <sup>4</sup> Division of Nephrology and Rheumatology, Department of Internal Medicine, Fukuoka University  
9 School of Medicine, Fukuoka, Japan

10 <sup>5</sup> Department of Rehabilitation, Fukuoka University Hospital, Fukuoka, Japan

11

12 Running title: Moderate intensity intermittent exercise and the kidneys

13

14 **\* Correspondence**

15 Ryoma Michishita, Ph.D.

16 Faculty of Health and Sports Science, Fukuoka University, 8-19-1 Nanakuma, Johnan-ku, Fukuoka 814-

17 0180, Fukuoka, Japan

18 Tel: +81-92-871-6631

19 Fax: +81-92-862-3033

20 e-mail: [rmichishita@fukuoka-u.ac.jp](mailto:rmichishita@fukuoka-u.ac.jp)

21

**NOTE: This preprint reports new research that has not been certified by peer review and should not be used to guide clinical practice.**

22 ***ORCID***

23 Shotaro Kawakami: 0000-0002-1334-1918

24 Kosuke Masutani: 0000-0001-9190-4600

25 Yoshinari Uehara: 0000-0001-6075-7329

26 Yasuki Higaki: 0000-0001-5127-4552

27 Ryoma Michishita: 0000-0003-4978-1592

28 **Abstract**

29 **Purpose** Moderate-intensity exercise has beneficial effects for individuals with CKD. However, it is  
30 unclear whether intermittent exercise (IE) has a different effect on renal haemodynamics compared to  
31 continuous exercise (CE). This study aimed to compare the effects of intermittent or continuous exercise  
32 on renal haemodynamics and renal injury during moderate-intensity exercise.

33 **Methods** Ten males underwent IE or CE to consider the effect of exercise on renal haemodynamics  
34 during moderate-intensity exercise. Renal haemodynamic assessment and blood-sampling were conducted  
35 before exercise (pre) and immediately (post 0), 30-min (post 30), and 60-min (post 60) after exercise. Urine-  
36 sampling was conducted in pre, post 0 and post 60.

37 **Results** There was no condition-by-time interaction ( $p = 0.073$ ), condition ( $p = 0.696$ ), or time ( $p =$   
38  $0.433$ ) effects regarding renal blood flow. There was a condition-by-time interaction effect regarding  
39 noradrenaline concentrations ( $p = 0.037$ ). Moreover, both conditions significantly increased noradrenaline  
40 concentration at post 0 (IE:  $p = 0.003$ , CE:  $p < 0.001$ ) and remained significantly higher in post 30 ( $p <$   
41  $0.001$ ) and post 60 ( $p < 0.001$ ). Significant difference was found in noradrenaline concentrations at post 0  
42 when comparing IE and CE ( $399 \pm 119$  vs.  $552 \pm 224$  pg/ml,  $p = 0.037$ ). Urinary neutrophil gelatinase-  
43 associated lipocalin concentrations increased at post 60 ( $p = 0.009$ ), but none of them exceeded the cutoff  
44 values for the definition of renal damage. Other renal injury biomarkers showed a similar pattern.

45 **Conclusion** These findings suggest that IE has a similar effect on renal haemodynamics and function,

46 and AKI biomarkers compared to CE.

47

48 **Keywords:** renal haemodynamic, moderate-intensity intermittent exercise, moderate-intensity continuous

49 exercise, acute kidney injury

50

51 ***Abbreviations***

52 (s) Cr (Serum) creatinine

53 (s) Cys (Serum) cystatin C

54 (u) Alb (Urinary) albumin

55 (u) Cr (Urinary) creatinine

56 (u) L-FABP (Urinary) liver-type fatty acid-binding protein

57 (u) uNAG (Urinary) N-acetyl-beta-d-glucosaminidase

58 (u) uKIM-1 (Urinary) kidney injury molecule 1

59 (u) uNGAL (Urinary) neutrophil gelatinase-associated lipocalin

60 ACSM American College Sports Medicine

61 AKI Acute kidney injury

62 BFV Blood flow velocity

63 BMI Body mass index

64 CKD Chronic kidney disease

65 CSA Cross sectional area

66 eGFR estimated glomerular filtration rate

67 ELISA Enzyme-linked immunosorbent assay

68 FF Filtration fraction

69 MICE Moderate intensity continuous exercise

70 MIIE Moderate intensity intermittent exercise

71 RAS Renin angiotensin system

72 RBF Renal blood flow

73 LT Lactate threshold

74 PRA Plasma renin activity

75 ***Introduction***

76 Recent reports demonstrate that moderate-intensity continuous exercise (MICE) has beneficial effects  
77 for individuals with chronic kidney disease (CKD) (Afsar et al. 2018; Vanden Wyngaert et al. 2018; Watson  
78 et al. 2018; Thompson et al. 2019). Accordingly, moderate intensity has been the recommended intensity  
79 for patients with CKD and may be quite attractive an option for these patients (Liguori et al. 2021). However,  
80 whether MICE affects renal haemodynamics and induces kidney injury remains unclear. Therefore, we  
81 recently investigated the influence of MICE on the kidneys and demonstrated that MICE maintains renal  
82 blood flow (RBF) and does not increase acute kidney injury (AKI) biomarkers (Kawakami et al. 2022).

83 Physical inactivity has deleterious effects on CKD progression (Zelle et al. 2017) and is an independent  
84 risk factors for CKD development, in addition to aging and obesity (Hallan et al. 2006). In contrast, physical  
85 activity, aerobic capacity, and muscle mass decrease even in the early stages of CKD, and continue to  
86 decrease with disease progression (Zelle et al. 2017; Kirkman et al. 2021). Accordingly, physical inactivity,  
87 decreased aerobic capacity, and reduced renal function cause a vicious cycle that must be broken. Previous  
88 studies investigated the associations between physical activity and the incidence and prevalence of CKD  
89 and revealed that regular exercise and higher physical activity suppress renal function decline (Michishita  
90 et al. 2016a, b, 2017). Therefore, regular exercise and increased physical activity may be key factors in the  
91 suppression of dialysis introduction and extension of healthy life expectancy (Beetham et al. 2022).  
92 However, patients with CKD patients with lower cardiorespiratory fitness and muscle strength (Kirkman

93 et al. 2021) are unable to perform continuous exercise, requiring the exploration of practicable exercise  
94 conditions. For some individuals with CKD who are unable to perform continuous exercise, the American  
95 College of Sports Medicine's (ACSM) guidelines state that these patients should perform moderate-  
96 intensity exercise at intervals (Liguori et al. 2021). A previous study of the acute effects of moderate-  
97 intensity intermittent exercise (MIIE) and MICE on arterial stiffness demonstrated that MIIE elicited a  
98 greater decrease in arterial stiffness than MICE (Zheng et al. 2015). In addition, a recent report (Meric et  
99 al. 2022) described a statistically significantly lower blood lactate concentration observed after MIIE than  
100 after MICE, suggesting that MIIE may be less metabolically effective in causing fatigue. However, to the  
101 best of our knowledge, no studies have examined the effects of MIIE on renal haemodynamics and function.  
102 Therefore, exploring the influence of MIIE on renal haemodynamics and function is important to provide  
103 practicable exercise conditions.

104 The hypothesis of this study is that MIIE has a more favourable effect on renal haemodynamics and  
105 function compared to MICE. To test this hypothesis, we compared the effects of MIIE and MICE on renal  
106 haemodynamics and function.

107

## 108 ***Material and Methods***

### 109 *Participants*

110 This study included 10 healthy adult males (age:  $37 \pm 8$  yr; height:  $1.72 \pm 0.05$  m; weight:  $67.4 \pm 6.0$

111 kg) (Table 1). The inclusion and exclusion criteria were as follows: the presence or absence of 1) estimated  
112 glomerular filtration rate (eGFR)  $\geq 60$  ml/min/1.73 m<sup>2</sup>, 2) serious or progressive disease and symptoms, 3)  
113 any specific underlying medical conditions (cardiovascular or cerebrovascular disease, receiving dialysis)  
114 or a history of associated symptoms, and 4) taking medications that affect systemic haemodynamics. At the  
115 time of designing the present study, to our knowledge, there were no published data on the effect size of  
116 MICE manipulation on renal haemodynamics. Therefore, a power calculation performed in a prior study  
117 that investigated the effect of MICE on endothelial function indicated that 12 participants would be  
118 estimated to be statistically appropriate, with a statistical power of 0.8 and an alpha of 0.05 (Meric et al.  
119 2022). Participants underwent a medical checkup, including an electrocardiogram, prior to participation to  
120 ensure that they were appropriate for this study. Twelve healthy, middle-aged adults were recruited in this  
121 study. However, one participant did not complete the experiment because of an unrelated injury, and one  
122 participant was unable to complete the experiment because of participant availability. Consequently, the  
123 data are presented as n = 10 throughout the experiment. Participants avoided strenuous exercise the day  
124 before testing, fasted 8 h prior to testing (drinking water was acceptable), and avoided breakfast, caffeine,  
125 and exercise on the test day. Although the MICE condition included data from previous study (Kawakami  
126 et al. 2024), the purpose of that study was to compare the effects of high-intensity intermittent exercise and  
127 MICE on renal haemodynamic parameters, whereas the purpose of this study was the effects of continuous  
128 or intermittent exercise on renal haemodynamics during moderate-intensity exercise. Therefore, this study

129 excluded duplicate publication.

130

131 *Incremental exercise test for determination of optimal exercise intensity*

132 All participants performed an incremental exercise test using a cycle ergometer (Lode; Corival, the  
133 Netherlands) to determine optimal exercise intensity as described previously (Kawakami et al. 2018). Blood  
134 was drawn from the ear lobe at rest and at 1-min intervals during exercise to determine blood lactate  
135 concentrations. In this study, we defined the lactate threshold (LT) intensity that exhibited no decrease in  
136 RBF as moderate-intensity based on our previous findings (Kawakami et al. 2018). The LT was decided by  
137 five technicians, and each technician assessed the steep-increase point of the LA by visual inspection of  
138 graphical plots of LA versus workload. LT was defined as the means of three of five values, excluding the  
139 maximum and the minimum values obtained from the participants.

140

141 *The consideration of the impacts of MICE and MIIE on renal haemodynamics*

142 On arrival, each participant provided urine samples, drank water, and rested for 5 minutes.  
143 Subsequently, renal haemodynamics were assessed using ultrasound echo. Blood samples were collected  
144 to determine the blood biochemistry following a renal haemodynamic assessment. Each participant  
145 performed MIIE (5-min at LT intensity and 1-min at rest) or MICE (30-min at LT intensity) using a cycle  
146 ergometer (Fig. 1). MIIE was performed for 5 min with a 1 min break between them and was repeated six



147 times so that the total energy consumption under both exercise conditions was the same. To match the total  
148 energy consumption of the MIIE and MICE conditions, the energy expenditure in both conditions was  
149 calculated using the following equation (Liguori et al. 2021): Energy expenditure (kcal) =  $[[[3.5 + 3.5 +$   
150  $[1.8 \times \text{workload (watts)} \times 6.12]/\text{body weight (kg)}]/3.5]-1] \times \text{exercise duration (hours)} \times \text{body weight (kg)}$   
151  $\times 1.05$ . Renal haemodynamic assessment and blood sampling were performed before exercise (*Pre*),  
152 immediately after exercise (*Post 0*), 30 minutes (*Post 30*), and 60 minutes (*Post 60*) after exercise. Urine  
153 samples were collected *Pre*, *Post 0*, and *Post 60*. HR and RPE were consistently measured throughout the  
154 experiment, and blood pressure was measured *Pre* and *Post 0*. We evaluated the influence of the (dis-)  
155 continuity of exercise on renal haemodynamics using ultrasonography. Blood and urine samples were  
156 collected to explore the mechanisms responsible for renal haemodynamic regulation and renal injury  
157 following exercise. Furthermore, the above two exercise conditions were performed in random order, with  
158 at least one week as the washout period between the two conditions. The participants received free  
159 hydration during and following the experiment.

160

#### 161 *The assessment of renal haemodynamics*

162 Renal haemodynamics were assessed by pulse Doppler using a 3.5 MHz convex electronic scanning  
163 probe of an ultrasound system (Aplio 300; Toshiba Medical Systems), as described previously (Kawakami  
164 et al. 2024). RBF, blood flow velocity (BFV), and cross-sectional area (CSA) were examined in this study.

165 There are several advantages to evaluate renal haemodynamics using ultrasound echo, which can non-  
166 invasively visualise blood vessels by applying a probe, leading to a reduction in the burden on the  
167 participants. Another benefit of ultrasound echo is that it evaluates the BFV and CSA of the renal artery in  
168 the kidney independently, enabling the examination of whether the variation in RBF is derived from  
169 variations in BFV and/or CSA.

170

171 *The determination of blood and urinary biomarkers*

172 Blood and urinary biomarkers were determined as described in our previous study (Kawakami et al.  
173 2022). Blood and urine samples were collected from the antecubital vein in the morning after an 8-h  
174 overnight fast, and adrenaline, noradrenaline, plasma renin activity (PRA), aldosterone, serum creatinine  
175 (sCr), and cystatin C (sCys) levels were measured. In addition, all participants provided urine samples to  
176 examine urinary creatinine (uCr), albumin (uAlb), liver-type fatty acid-binding protein (uL-FABP), and N-  
177 acetyl-beta-d-glucosaminidase (uNAG) levels to assess renal injury in response to exercise. Furthermore,  
178 we measured urinary kidney injury molecule 1 (uKIM-1) in duplicate using a sandwich ELISA kit (Human  
179 Urinary KIM-1 Quantikine ELISA Kit, R&D Systems, United States) and urinary neutrophil gelatinase-  
180 associated lipocalin (uNGAL) in duplicate using a sandwich ELISA kit (Human NGAL Quantikine ELISA  
181 Kit, R&D Systems, United States) to examine kidney injury response to exercise. Each blood sample was  
182 centrifuged for 10 min at 1750×g at 4 °C, and a part of the urine sample was centrifuged for 5 min at 400×g

183 at 4 °C. Samples were stored at -80°C until analysis. The analyses were performed by a commercial blood  
184 and urine company (LSI Medience Corp., Tokyo, Japan). Furthermore, eGFR with sCr or sCys and filtration  
185 fraction (FF) as indicators of renal function and renal haemodynamics, was calculated as described in our  
186 previous study (Kawakami et al. 2022).

187

### 188 *Statistical analysis*

189 The influence of a single bout of MIIE and MICE on all outcome measures was analysed using a two-  
190 way analysis of variance. Bonferroni's *post hoc* test was performed for significant main or interaction  
191 effects. All statistical analyses were performed using Prism version 10.0.2 (GraphPad Software, San Diego,  
192 CA, USA).  $P < 0.05$  was considered statistically significant. Experimental data are shown as the mean  $\pm$   
193 standard deviation.

194

### 195 **Results**

196 ***Renal haemodynamics following MIIE and MICE conditions.*** Figure 2 shows the influence of  
197 continuity during moderate intensity exercise on renal haemodynamics. There were no condition-by-time  
198 interaction, time, or condition effects on the changes in RBF (Fig. 2A), BFV (Fig. 2B) and CSA (Fig. 2C).

199

200 ***Renal function and injury.*** Figure 3 shows the uCr, uAlb, uNAG, uL-FABP, uKIM-1, and uNGAL

201 excretion responses to MIIE and MICE, all AKI biomarkers that were corrected for uCr levels. There were  
202 no condition-by-time interaction or condition effects; however, there was a time effect ( $p = 0.006$ ) for uCr  
203 (Fig. 3A). The uCr exhibited no significant changes at *Post 0* compared with *Pre* and exhibited a significant  
204 decrease at *Post 60* ( $p = 0.003$ ) in both conditions. There were no condition-by-time interaction, time, or  
205 condition effects on changes in uAlb (Fig. 3B), uNAG (Fig. 3C), uL-FABP (Fig. 3D) levels. There were no  
206 condition-by-time interaction or condition effects; however, there was a time effect for the uKIM-1 (Fig.  
207 3E;  $p = 0.014$ ) and uNGAL levels (Fig. 3F;  $p = 0.016$ ). The uKIM-1 levels exhibited no significant changes  
208 at *Post 0* compared to *Pre* and exhibited a significant decrease at *Post 60* ( $p = 0.009$ ) in both conditions.  
209 The uNGAL levels had no significant changes at *Post 0* compared to *Pre* and exhibited a significant increase  
210 at *Post 60* ( $p = 0.009$ ) in both conditions.

211 Moreover, there were no condition-by-time interaction, time, or condition effects on the changes in sCr  
212 (Fig. 4A), sCys (Fig. 4B), eGFR<sub>cre</sub> (Fig. 4C), eGFR<sub>cys</sub> (Fig. 4D), FF<sub>cre</sub> (Fig. 4E), or FF<sub>cys</sub> (Fig. 4F) levels.

213

214 ***Biochemical parameters associated with the regulation of renal haemodynamics.*** Changes in  
215 catecholamines and measures of the renin-angiotensin system (RAS) before and after the exercise and  
216 recovery phase are shown in Figure 5. A condition-by-time interaction effect was observed for  
217 noradrenaline (Fig. 5A;  $p = 0.037$ ). Noradrenaline at *Pre* did not differ between the conditions; however,  
218 the noradrenaline level at *Post 0* was lower in the MIIE condition than in the MICE condition ( $p = 0.037$ ).

219 In the MIIE condition, noradrenaline exhibited a significant increase at *Post 0* compared to *Pre* ( $p = 0.003$ )  
220 and remained significantly higher at *Post 30* ( $p < 0.001$ ) and *Post 60* ( $p < 0.001$ ). In contrast, noradrenaline  
221 showed a significant increase at *Post 0* compared to *Pre* ( $p < 0.001$ ) and remained significantly higher at  
222 *Post 30* ( $p < 0.001$ ) and *Post 60* ( $p = 0.001$ ) in the MICE condition.

223 There was no condition-by-time interaction effect for changes in adrenaline (Fig. 5B), PRA (Fig. 5C),  
224 or aldosterone (Fig. 5D) levels; however, there was a time effect for adrenaline ( $p < 0.001$ ), PRA ( $p = 0.002$ )  
225 and aldosterone ( $p < 0.001$ ) levels. Compared to *Pre*, adrenaline ( $p < 0.001$ ) and PRA ( $p < 0.001$ ) increased  
226 significantly at *Post 0* and showed no significant changes at *Post 30* and *Post 60* in either condition.  
227 Aldosterone levels were significantly higher at *Post 0* than at *Pre* ( $p < 0.001$ ) and remained significantly  
228 higher at *Post 30* ( $p < 0.001$ ) and *Post 60* ( $p = 0.017$ ) under both conditions.

229

230 ***Physiological variables following MICE and MIIE conditions.*** The variations in physiological  
231 parameters before and immediately after exercise and during the recovery period under both conditions  
232 (Table 2). There were no condition-by-time interaction effects; however, there was a time effect ( $p < 0.001$ )  
233 on heart rate. A condition-by-time interaction effect was observed regarding systolic blood pressure ( $p =$   
234  $0.011$ ). Systolic blood pressure before exercise did not differ between conditions, and systolic blood  
235 pressure exhibited a significant increase after exercise compared to before exercise in both conditions ( $p <$   
236  $0.01$ ,  $p < 0.01$ , respectively). However, the systolic blood pressure after exercise was lower in the MIIE

237 condition than in the MICE condition ( $p = 0.046$ ). There were no condition-by-time interaction, condition,  
238 or time effects on the changes in diastolic blood pressure and blood lactate concentrations.

239

## 240 *Discussion*

241 We evaluated the effects of intermittent and continuous exercise on renal haemodynamic and functional  
242 parameters during moderate-intensity exercise using ultrasound echo. The effects of MIIE and MICE  
243 exercise on AKI biomarkers were also assessed. Contrary to our hypothesis, MIIE had a similar effect on  
244 renal haemodynamics and function, and AKI biomarkers compared to MICE. MIIE and MICE maintained  
245 the RBF, eGFR, and FF levels and did not induce changes in AKI biomarkers. Notably, noradrenaline  
246 concentrations immediately after exercise were significantly lower under MIIE conditions than under  
247 MICE conditions.

248 The intensity of exercise may be a crucial factor affecting renal haemodynamics and AKI biomarkers.  
249 A moderate intensity is recommended as an intensity for individuals with CKD (Liguori et al. 2021). Many  
250 previous studies have reported that moderate-intensity exercise has beneficial effects in non-dialysis  
251 patients with CKD (Howden et al. 2012; Vanden Wyngaert et al. 2018; Watson et al. 2018; Kirkman et al.  
252 2019; Thompson et al. 2019); however, there are few reports on the effects of moderate-intensity exercise  
253 on renal function (Greenwood et al. 2015; Santana et al. 2017; Bongers et al. 2017; Kawakami et al. 2022).  
254 According to previous studies (Wołynec et al. 2020; Kosaki et al. 2020; Juett et al. 2021), a significant

255 increase in AKI biomarkers was observed after high-intensity exercise, suggesting the possibility that  
256 glomerular abnormalities, tubular hypoxia, and tubulointerstitial damage are caused by exercise. Moreover,  
257 renal haemodynamics are strongly influenced by exercise intensity; RBF decreases in an intensity-  
258 dependent manner with exercise through the distribution of blood flow (Kawakami et al. 2018; Kotoku et  
259 al. 2019). However, these studies revealed that RBF does not decrease until moderate intensity and then  
260 decreases in an intensity-dependent manner at higher intensities. Therefore, participants who performed  
261 exercise at LT intensity did not have a decrease in RBF as moderate intensity, and there were no significant  
262 changes in AKI biomarkers following moderate-intensity exercise in the current study.

263 It is crucial for patients with CKD to exercise regularly. However, some patients with CKD may not  
264 be able to exercise continuously because of reduced cardiopulmonary function and skeletal muscle mass;  
265 therefore, the ACSM guidelines state that they should perform moderate-intensity exercise at intervals  
266 (Liguori et al. 2021). Exercise duration may be another crucial factor affecting central and peripheral  
267 circulation. A previous study (Seeger et al. 2015) examining the acute effects of intermittent exercise (IE)  
268 or continuous exercise (CE) on the vascular endothelium found that a single bout of IE, but not of CE,  
269 prevented endothelial ischaemia-reperfusion injury. Moreover, aerobic interval training promotes larger  
270 size and thickness of the renal tubule and improves renal functionality (Martínez et al. 2019). More recently,  
271 Meric et al. reported that a single bout of MIIE seems to have an effect on vascular endothelial function  
272 similar to that of MICE (Meric et al. 2022). Therefore, MIIE has been shown to have beneficial effects, and

273 is recommended as part of a well-balanced exercise program. To the best of our knowledge, this is the first  
274 study to compare the acute effects of MIIE and MICE on renal haemodynamics.

275 A decrease in RBF due to exercise increases the glomerular permeability and enhances the filtration  
276 fraction (Poortmans et al. 1996; Svarstad et al. 2002), resulting in a decrease in the glomerular filtration  
277 rate and transient proteinuria (Grimby 1965; Clorius et al. 1996). Furthermore, a decrease in RBF with  
278 exercise induces a transient decrease in the peritubular capillary blood flow, which may lead to acute  
279 adverse effects on tubular conditions (Kosaki et al. 2020). Therefore, it is important to explore the effects  
280 of exercise on renal haemodynamics. We compared the effects of MIIE and MICE on renal haemodynamic  
281 parameters using ultrasound echo and showed that MIIE and MICE did not cause a significant change in  
282 BFV or CSA and consequently did not decrease RBF. Therefore, these findings demonstrate that MIIE and  
283 MICE have comparable effects on renal haemodynamic parameters. We also examined the effects of MIIE  
284 and MICE on catecholamine levels and RAS parameters to explore the mechanisms underlying renal  
285 haemodynamic regulation. Our detailed analysis revealed that adrenaline, PRA, and aldosterone had similar  
286 patterns under MIIE and MICE conditions. However, MIIE had a different effect on noradrenaline levels  
287 than MICE. A significant increase in noradrenaline concentration was observed immediately after MIIE  
288 and MICE. Moreover, the noradrenaline concentrations immediately after MIIE were significantly lower  
289 than those immediately after MICE. These findings demonstrate that IE suppressed the increase in  
290 noradrenaline concentration compared to CE during moderate-intensity exercise, suggesting that MIIE does



291 not stimulate the sympathetic nervous system compared to MICE and is recommended to patients with  
292 CKD who have the sympathetic overactivity.

293 A few studies have examined the acute effects of IE and CE on the biomarkers of kidney injury. A  
294 recent study investigating the effect of manipulating hydration status during high-intensity intermittent  
295 running on AKI biomarkers suggested that hypohydration produced by high-intensity intermittent running  
296 increased renal injury compared to when euhydration was maintained (Juett et al. 2021). Houck et al.  
297 (Houck et al. 2022) examined the effects of MIIE and MICE on AKI biomarkers and renal function in hot  
298 environments. They revealed that MIIE and MICE in hot environments caused an increase in the biomarkers  
299 of kidney injury. Furthermore, we recently examined the acute effects of HIIE and MICE on AKI  
300 biomarkers in temperature-controlled conditions and demonstrated that glomerular or proximal tubular  
301 injury was not induced following a single bout of HIIE or MICE (Kawakami et al. 2024). Exercise-induced  
302 increases in AKI biomarkers appear to be dependent on the intensity or duration of exercise and the  
303 surrounding environment and have been shown to influence AKI biomarkers, which is primarily attributed  
304 to a greater magnitude of hyperthermia and hypovolaemia (Schlader et al. 2017; Chapman et al. 2020). In  
305 this study, we compared the acute effects of MIIE and MICE on AKI biomarkers under temperature-  
306 controlled conditions and demonstrated that neither MIIE nor MICE impaired the glomeruli or tubules. The  
307 assessment of urinary AKI biomarkers is likely influenced by changes in hydration status, and urinary  
308 biomarkers have been corrected for urinary osmolality (Juett et al. 2021; Houck et al. 2022). However,

309 urinary osmolality was not measured in this study, and the effect of exercise on AKI biomarkers could not  
310 be examined in the context of hydration status. Therefore, further studies are needed to examine changes  
311 in urinary biomarkers corrected for urinary osmolality for hydration status.

312 Our study had some limitations. First, one of the main limitations was its relatively small sample size,  
313 which should be considered when interpreting the results. Secondly, we included middle-aged males ( $37 \pm$   
314  $8$  years) with relatively preserved renal function ( $\text{eGFR} \geq 60$  ml/min/1.73 m<sup>2</sup>) in this study. The renal  
315 haemodynamic response to exercise may vary depending on the severity of the renal functional impairment.  
316 Therefore, similar studies using non-dialysis patients with CKD ( $\text{eGFR} < 60$  ml/min/1.73 m<sup>2</sup>) should be  
317 performed in the future for clinical application.

318 In the current study, we investigated whether the effects of MIIE on renal haemodynamic and  
319 functional parameters as well as AKI biomarkers were different from those of MICE. Our findings  
320 demonstrated that there were no differences in renal haemodynamic responses to MIIE and MICE and that  
321 eGFR and FF exhibited a similar pattern under both conditions. MIIE and MICE did not alter the uL-FABP  
322 and uKIM-1 levels, indicating that neither MIIE nor MICE affected the glomeruli or tubules. Furthermore,  
323 our study provides novel evidence that moderate-intensity exercise with intervals suppresses the increase  
324 in noradrenaline concentration, suggesting that MIIE does not stimulate the sympathetic nervous system as  
325 compared to MICE. These findings provide additional data for designing effective exercise programs to  
326 prevent renal function decline, which could significantly contribute to the development of appropriate

327 medical care.

328 To date, several studies have demonstrated the benefits of exercise in patients with CKD (Greenwood  
329 et al. 2015; Kirkman et al. 2019; Beetham et al. 2022), and exercise therapy may be an effective non-  
330 pharmacologic strategy. However, ideal exercise training programs for individuals with CKD have not yet  
331 been fully developed (Liguori et al. 2021). Therefore, it is important to accurately understand the effects of  
332 exercise conditions on kidneys to identify effective exercise conditions that minimise their burden. Our  
333 future perspective is to explore the effects of physical exercise on the kidney under different exercise  
334 conditions and to examine whether physical exercise can enhance or reversibly restore renal function.  
335 Ultrasound echo was used to examine the acute effects of MIIE or MICE on detailed renal haemodynamics,  
336 which minimised the burden on the participants. Therefore, ultrasound echoes may be clinically useful to  
337 noninvasively monitor renal haemodynamic changes following exercise.

338

### 339 ***Conclusions***

340 To our knowledge, this is the first study to investigate the effects of MIIE and MICE on renal  
341 haemodynamic parameters using ultrasound echo. Our findings demonstrated that there were no differences  
342 in the renal haemodynamic responses to MIIE and MICE. It also shows that MIIE and MICE do not alter  
343 urinary L-FABP and KIM-1 levels, indicating that neither condition affects the glomeruli or tubules. These  
344 findings suggest that MIIE has a similar effect on renal haemodynamics and function, and AKI biomarkers

345 as MICE.

346

347 **Acknowledgements** The authors thank the volunteers who participated in this study and acknowledge the  
348 contribution of the staff at Fukuoka University, who heled with the recruitment of participants.

349

350 **Fundings** This study was supported by a Grant-in-Aid for Scientific Research (C) from the Japan Society  
351 for the Promotion of Science (JSPS) (to SK, no. 22K11489), and Fukuoka University Institute for Physical  
352 Activity, Fukuoka, Japan.

353

354 **Author Contributions** S. Kawakami, T.Y., and R.M. conceived and designed research; S. Kawakami, T.Y.,  
355 S.K., and A.I. performed experiments; S. Kawakami analyzed data; S. Kawakami, T.Y., and R.M.  
356 interpreted results of experiments; S. Kawakami prepared figures; S. Kawakami drafted manuscript; S.  
357 Kawakami, T.Y., S.K., A.I., K.F., T.M., S.N., K.M., Y.U., Y.H., and R.M. edited and revised manuscript;  
358 and all authors approved final version of manuscript.

359

360 **Data availability statement** The data that support the findings of the present study are available from the  
361 corresponding author upon reasonable request.

362

363 *Statements and Declarations*

364 **Disclosures** No conflicts of interest, financial or otherwise, are declared by the authors.

365

366 **Ethical approval** The study protocol (22-06-M1), which complies with the Declaration of Helsinki and the

367 principles of Good Clinical Practice, was approved by the Ethics Committee of Fukuoka University.

368 Participants in this study submitted signed informed consent after having all potential risks and procedures

369 fully explained to them.

370 **References**

- 371 Afsar B, Siriopol D, Aslan G, et al (2018) The impact of exercise on physical function, cardiovascular  
372 outcomes and quality of life in chronic kidney disease patients: a systematic review. *Int Urol Nephrol*  
373 50:885–904. <https://doi.org/10.1007/s11255-018-1790-4>
- 374 Beetham KS, Krishnasamy R, Stanton T, et al (2022) Effect of a 3-year lifestyle intervention in patients  
375 with chronic kidney disease: a randomized clinical trial. *J Am Soc Nephrol* 33:431–441.  
376 <https://doi.org/10.1681/ASN.2021050668>
- 377 Bongers CCWG, Alsady M, Nijenhuis T, et al (2017) Impact of acute versus repetitive moderate intensity  
378 endurance exercise on kidney injury markers. *Physiol Rep* 5:e13544.  
379 <https://doi.org/10.14814/phy2.13544>
- 380 Chapman CL, Johnson BD, Vargas NT, et al (2020) Both hyperthermia and dehydration during physical  
381 work in the heat contribute to the risk of acute kidney injury. *J Appl Physiol* 128:715–728.  
382 <https://doi.org/10.1152/jappphysiol.00787.2019>
- 383 Clorius J, Mandelbaum A, Hupp T, et al (1996) Exercise activates renal dysfunction in hypertension. *Am*  
384 *J Hypertens* 9:653–661. [https://doi.org/10.1016/0895-7061\(96\)00036-2](https://doi.org/10.1016/0895-7061(96)00036-2)
- 385 Greenwood SA, Koufaki P, Mercer TH, et al (2015) Effect of exercise training on estimated GFR, vascular  
386 health, and cardiorespiratory fitness in patients with CKD: a pilot randomized controlled trial. *Am J*  
387 *Kidney Dis* 65:425–434. <https://doi.org/10.1053/j.ajkd.2014.07.015>

- 388 Grimby G (1965) Renal clearances during prolonged supine exercise at different loads. *J Appl Physiol*
- 389 20:1294–1298. <https://doi.org/10.1152/jappl.1965.20.6.1294>
- 390 Hallan S, De Mutsert R, Carlsen S, et al (2006) Obesity, smoking, and physical inactivity as risk factors for
- 391 CKD: Are men more vulnerable? *Am J Kidney Dis* 47:396–405
- 392 Houck J, McKenna Z, Fennel Z, et al (2022) The effect of interval and continuous work on markers of
- 393 acute kidney injury in a hot environment. *Eur J Appl Physiol* 122:2437–2450.
- 394 <https://doi.org/10.1007/s00421-022-05030-1>
- 395 Howden EJ, Fassett RG, Isbel NM, Coombes JS (2012) Exercise training in chronic kidney disease patients.
- 396 *Sport Med* 42:473–488. <https://doi.org/10.2165/11630800-000000000-00000>
- 397 Juett LA, Midwood KL, Funnell MP, et al (2021) Hypohydration produced by high-intensity intermittent
- 398 running increases biomarkers of renal injury in males. *Eur J Appl Physiol* 121:3485–3497.
- 399 <https://doi.org/10.1007/s00421-021-04804-3>
- 400 Kawakami S, Yasuno T, Kawakami S, et al (2022) The moderate-intensity continuous exercise maintains
- 401 renal blood flow and does not impair the renal function. *Physiol Rep* 10:e15420.
- 402 <https://doi.org/10.14814/phy2.15420>
- 403 Kawakami S, Yasuno T, Kawakami S, et al (2024) Effects of high-intensity intermittent exercise versus
- 404 moderate-intensity continuous exercise on renal hemodynamics assessed by ultrasound echo. *Physiol*
- 405 *Rep* 12:e15925. <https://doi.org/10.14814/phy2.15925>

- 406 Kawakami S, Yasuno T, Matsuda T, et al (2018) Association between exercise intensity and renal blood  
407 flow evaluated using ultrasound echo. *Clin Exp Nephrol* 22:1061–1068.  
408 <https://doi.org/10.1007/s10157-018-1559-1>
- 409 Kirkman DL, Bohmke N, Carbone S, et al (2021) Exercise intolerance in kidney diseases: physiological  
410 contributors and therapeutic strategies. *Am J Physiol Renal Physiol* 320:F161–F173.  
411 <https://doi.org/10.1152/ajprenal.00437.2020>
- 412 Kirkman DL, Ramick MG, Muth BJ, et al (2019) Effects of aerobic exercise on vascular function in  
413 nondialysis chronic kidney disease: a randomized controlled trial. *Am J Physiol Renal Physiol*  
414 316:F898–F905. <https://doi.org/10.1152/ajprenal.00539.2018>
- 415 Kosaki K, Kamijo-Ikemori A, Sugaya T, et al (2020) Incremental short maximal exercise increases urinary  
416 liver-type fatty acid-binding protein in adults without CKD. *Scand J Med Sci Sports* 30:709–715.  
417 <https://doi.org/10.1111/sms.13618>
- 418 Kotoku K, Yasuno T, Kawakami S, et al (2019) Effect of exercise intensity on renal blood flow in patients  
419 with chronic kidney disease stage 2. *Clin Exp Nephrol* 23:621–628. [https://doi.org/10.1007/s10157-](https://doi.org/10.1007/s10157-018-01685-3)  
420 [018-01685-3](https://doi.org/10.1007/s10157-018-01685-3)
- 421 Liguori G, Feito Y, Fountaine C, Roy B (2021) ACSM’s guidelines for exercise testing and prescription,  
422 11th ed. Lippincott Williams & Wilkins, Philadelphia
- 423 Martínez R, Kapravelou G, López-Chaves C, et al (2019) Aerobic interval exercise improves renal



- 424 functionality and affects mineral metabolism in obese Zucker rats. *Am J Physiol Renal Physiol*
- 425 316:F90–F100. <https://doi.org/10.1152/ajprenal.00356.2018>
- 426 Meric B, Solak S, Aydogdu N, et al (2022) The comparison of endothelial function of moderate intensity
- 427 interval exercise with continuous exercise in healthy men. *Curr Res Physiol* 5:338–343.
- 428 <https://doi.org/10.1016/j.crphys.2022.07.003>
- 429 Michishita R, Matsuda T, Kawakami S, et al (2016a) The accumulation of healthy lifestyle behaviors
- 430 prevents the incidence of chronic kidney disease (CKD) in middle-aged and older males. *Environ*
- 431 *Health Prev Med* 21:129–137. <https://doi.org/10.1007/s12199-016-0506-6>
- 432 Michishita R, Matsuda T, Kawakami S, et al (2016b) The association between unhealthy lifestyle behaviors
- 433 and the prevalence of chronic kidney disease (CKD) in middle-aged and older men. *J Epidemiol*
- 434 26:378–385
- 435 Michishita R, Matsuda T, Kawakami S, et al (2017) The association between changes in lifestyle behaviors
- 436 and the incidence of chronic kidney disease (CKD) in middle-aged and older men. *J Epidemiol*
- 437 27:389–397
- 438 Poortmans JR, Mathieu N, de Plaen P (1996) Influence of running different distances on renal glomerular
- 439 and tubular impairment in humans. *Eur J Appl Physiol Occup Physiol* 72:522–527.
- 440 <https://doi.org/10.1007/BF00242285>
- 441 Santana DA, Poortmans JR, Dórea EL, et al (2017) Acute exercise does not impair renal function in

- 442 nondialysis chronic kidney disease patients regardless of disease stage. *Am J Physiol Renal Physiol*
- 443 313:F547–F552. <https://doi.org/10.1152/ajprenal.00131.2017>
- 444 Schlader ZJ, Chapman CL, Sarker S, et al (2017) Firefighter work duration influences the extent of acute
- 445 kidney injury. *Med Sci Sport Exerc* 49:1745–1753. <https://doi.org/10.1249/MSS.0000000000001254>
- 446 Seeger JPH, Lenting CJ, Schreuder THA, et al (2015) Interval exercise, but not endurance exercise,
- 447 prevents endothelial ischemia-reperfusion injury in healthy subjects. *Am J Physiol Circ Physiol*
- 448 308:H351–H357. <https://doi.org/10.1152/ajpheart.00647.2014>
- 449 Svarstad E, Myking O, Ofstad J, Iversen BM (2002) Effect of light exercise on renal hemodynamics in
- 450 patients with hypertension and chronic renal disease. *Scand J Urol Nephrol* 36:464–472.
- 451 <https://doi.org/10.1080/003655902762467648>
- 452 Thompson S, Wiebe N, Padwal RS, et al (2019) The effect of exercise on blood pressure in chronic kidney
- 453 disease: A systematic review and meta-analysis of randomized controlled trials. *PLoS One*
- 454 14:e0211032. <https://doi.org/10.1371/journal.pone.0211032>
- 455 Vanden Wyngaert K, Van Craenenbroeck AH, Van Biesen W, et al (2018) The effects of aerobic exercise
- 456 on eGFR, blood pressure and VO<sub>2</sub>peak in patients with chronic kidney disease stages 3-4: A
- 457 systematic review and meta-analysis. *PLoS One* 13:e0203662.
- 458 <https://doi.org/10.1371/journal.pone.0203662>
- 459 Watson EL, Gould DW, Wilkinson TJ, et al (2018) Twelve-week combined resistance and aerobic training

- 460 confers greater benefits than aerobic training alone in nondialysis CKD. *Am J Physiol Renal Physiol*
- 461 314:F1188–F1196. <https://doi.org/10.1152/ajprenal.00012.2018>
- 462 Wołyniec W, Ratkowski W, Renke J, Renke M (2020) Changes in novel AKI biomarkers after exercise. A
- 463 systematic review. *Int J Mol Sci* 21:5673. <https://doi.org/10.3390/ijms21165673>
- 464 Zelle DM, Klaassen G, Van Adrichem E, et al (2017) Physical inactivity: A risk factor and target for
- 465 intervention in renal care. *Nat Rev Nephrol* 13:152–168. <https://doi.org/10.1038/nrneph.2016.187>
- 466 Zheng L, Zhang X, Zhu W, et al (2015) Acute effects of moderate-intensity continuous and accumulated
- 467 exercise on arterial stiffness in healthy young men. *Eur J Appl Physiol* 115:177–185.
- 468 <https://doi.org/10.1007/s00421-014-3008-5>

469 Table 1 Participant characteristics

470

|                                    |             |
|------------------------------------|-------------|
| Age, yr                            | 37 ± 8      |
| Height, m                          | 1.72 ± 0.05 |
| Weight, kg                         | 67.4 ± 6.0  |
| Body Mass Index, kg/m <sup>2</sup> | 22.9 ± 2.0  |
| Systolic blood pressure, mmHg      | 110 ± 7     |
| Diastolic blood pressure, mmHg     | 74 ± 9      |
| Serum creatinine, mg/dL            | 0.86 ± 0.07 |
| eGFR, ml/min/1.73m <sup>2</sup>    | 82 ± 9      |
| VO <sub>2</sub> peak, ml/kg/min    | 37.0 ± 9.9  |
| VO <sub>2</sub> @LT, ml/kg/min     | 13.2 ± 4.6  |

471

472 Data are expressed as the mean ± SD.

473 **eGFR** estimated glomerular filtration rate, **LT** lactate threshold, **VO<sub>2</sub>peak** peak oxygen

474 uptake

475 Table 2 Comparison of physiological variables before and after MICE and MIIE, and recovery phase

|                                     | MICE (n = 10) |            | MIIE (n = 10) |              | Interaction effect | Time effect | Condition effect |
|-------------------------------------|---------------|------------|---------------|--------------|--------------------|-------------|------------------|
|                                     | before Ex     | after Ex   | before Ex     | after Ex     |                    |             |                  |
| Heart rate, bpm                     | 67 ± 10       | 100 ± 14   | 66 ± 10       | 94 ± 12      | p = 0.111          | p < 0.001   | p = 0.042        |
| Systolic blood pressure, mmHg       | 107 ± 10      | 146 ± 15** | 108 ± 8       | 139 ± 16**,# | p = 0.011          | p < 0.001   | p = 0.117        |
| Diastolic blood pressure, mmHg      | 76 ± 10       | 76 ± 13    | 75 ± 12       | 78 ± 13      | p = 0.506          | p = 0.767   | p = 0.836        |
| Blood lactate concentration, mmol/L | 1.5 ± 0.3     | 1.9 ± 0.4  | 1.6 ± 0.3     | 1.8 ± 0.3    | p = 0.399          | p = 0.06    | p = 0.693        |

476

477 Data are expressed as the mean SD.

478 **MICE** moderate-intensity continuous exercise, **MIIE** moderate-intensity intermittent exercise.

479 \* p < 0.05, \*\* p < 0.01 vs. before Ex. # p < 0.05, ## p < 0.01 vs. MICE

480 **Figure captions**

481 **Fig. 1** Experimental protocol. All participants performed (A) 30 minutes continuous exercise and/or (B)  
482 intermittent exercise at LT intensity using cycle ergometer. Moderate-intensity intermittent exercise was  
483 performed for 5 min with 1 min break between them, and it repeated 6 times so that the total energy  
484 consumption of both exercise conditions was the same. The above two exercise conditions were performed  
485 in random order, with at least one week as a washout period between the two conditions. Renal  
486 haemodynamics assessment and blood-sampling were performed before exercise (*Pre*), immediately after  
487 exercise (*Post 0*), 30 minutes (*Post 30*) and 60 minutes (*Post 60*) after exercise. Urine samples were taken  
488 in *Pre*, *Post 0* and *Post 60*

489

490 **Fig. 2** Changes in renal blood flow (A), blood flow velocity (B) and cross-sectional area (C) from before  
491 exercise (*Pre*) to immediately after exercise (*Post 0*) to 30 min post-exercise (*Post 30*) to 60 min post-  
492 exercise (*Post 60*) in MICE (filled bar, n = 10) and MIIE (open bar, n = 10). Data are the mean ± standard  
493 deviation. Open circles represent individual data. Multiple pairwise comparisons were corrected using the  
494 Bonferroni method

495

496 **Fig. 3** Changes in acute kidney injury biomarkers before and after exercise and recovery phase. Changes  
497 in urinary creatinine (A), urinary albumin (B), N-acetyl-beta-d-glucosaminidase (C), liver-type fatty acid-  
498 binding protein (D), kidney molecule injury 1 (E), neutrophil gelatinase-associated lipocalin (F) from  
499 before exercise (*Pre*) to immediately after exercise (*Post 0*) to 60 min post-exercise (*Post 60*) in MICE  
500 (filled bar, n = 10) and MIIE (open bar, n = 10). Data are the mean ± standard deviation. \* p < 0.05, \*\* p <  
501 0.01, \*\*\* p < 0.005 vs. *Pre*. # p < 0.05, ## p < 0.01 vs. MICE. <sup>a</sup>Data are available as follows: MICE, n = 9;  
502 MIIE, n = 9. <sup>b</sup>Data are available as follows: MICE, n = 6; MIIE, n = 5. Open circles represent individual  
503 data. Multiple pairwise comparisons were corrected using the Bonferroni method

504

505 **Fig. 4** Changes in renal function parameters before and after exercise and recovery phase. Changes in serum  
506 creatinine (**A**), serum cystatin C (**B**), estimated  $GFR_{cre}$  (**C**), estimated  $GFR_{cys}$  (**D**), filtration fraction  
507 (creatinine) (**E**), filtration fraction (cystatin C) (**F**) from before exercise (*Pre*) to immediately after exercise  
508 (*Post 0*) to 30 min post-exercise (*Post 30*) to 60 min post-exercise (*Post 60*) in MICE (filled bar, n = 10)  
509 and MIIE (open bar, n = 10). Data are the mean  $\pm$  standard deviation. **GFR** glomerular filtration rate. Open  
510 circles represent individual data. Multiple pairwise comparisons were corrected using the Bonferroni  
511 method

512

513 **Fig. 5** Changes in noradrenaline (**A**), adrenaline (**B**), plasma renin activity (**C**), aldosterone (**D**) from before  
514 exercise (*Pre*) to immediately after exercise (*Post 0*) to 30 min post-exercise (*Post 30*) to 60 min post-  
515 exercise (*Post 60*) in MICE (filled bar, n = 10) and MIIE (open bar, n = 10). Data are the mean  $\pm$  standard  
516 deviation. \* p < 0.05, \*\* p < 0.01, \*\*\* p < 0.005, \*\*\*\* p < 0.001 vs. *Pre*. # p < 0.05 vs. MICE. Open circles  
517 represent individual data. Multiple pairwise comparisons were corrected using the Bonferroni method

## (A) Moderate-Intensity Continuous Exercise (MICE)

30 minutes @ LT intensity

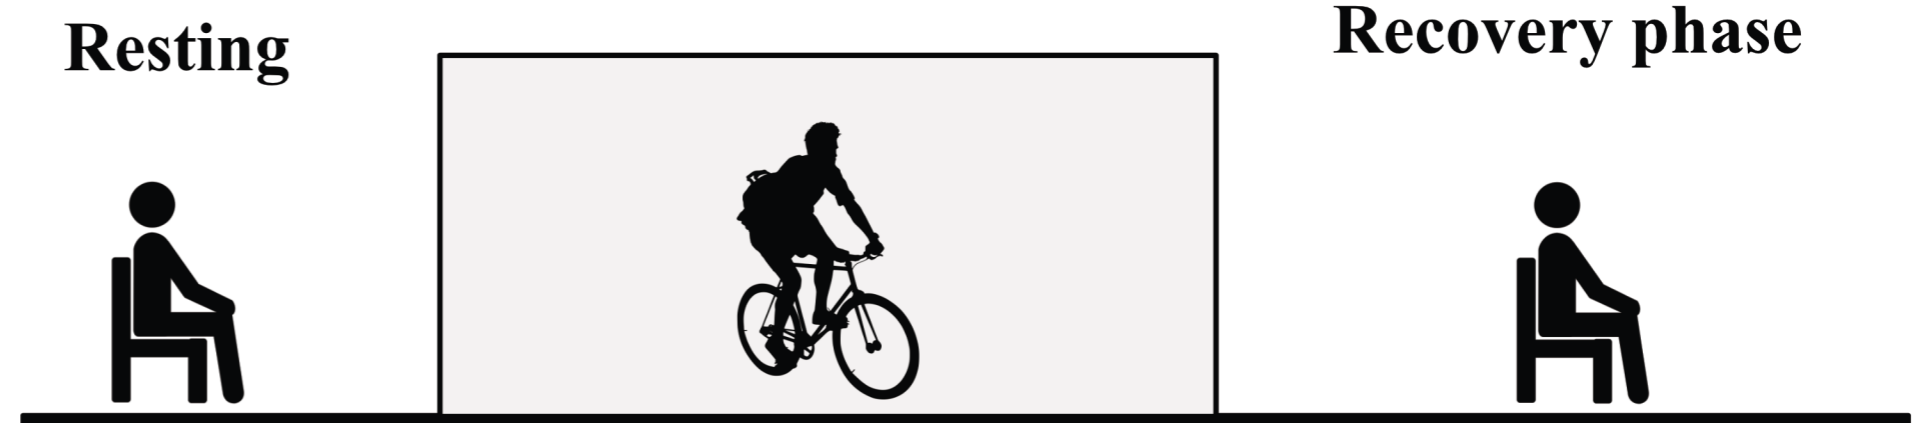

## (B) Moderate-Intensity Intermittent Exercise (MIIE)

5 minute @ LT intensity and 1 minutes @ rest

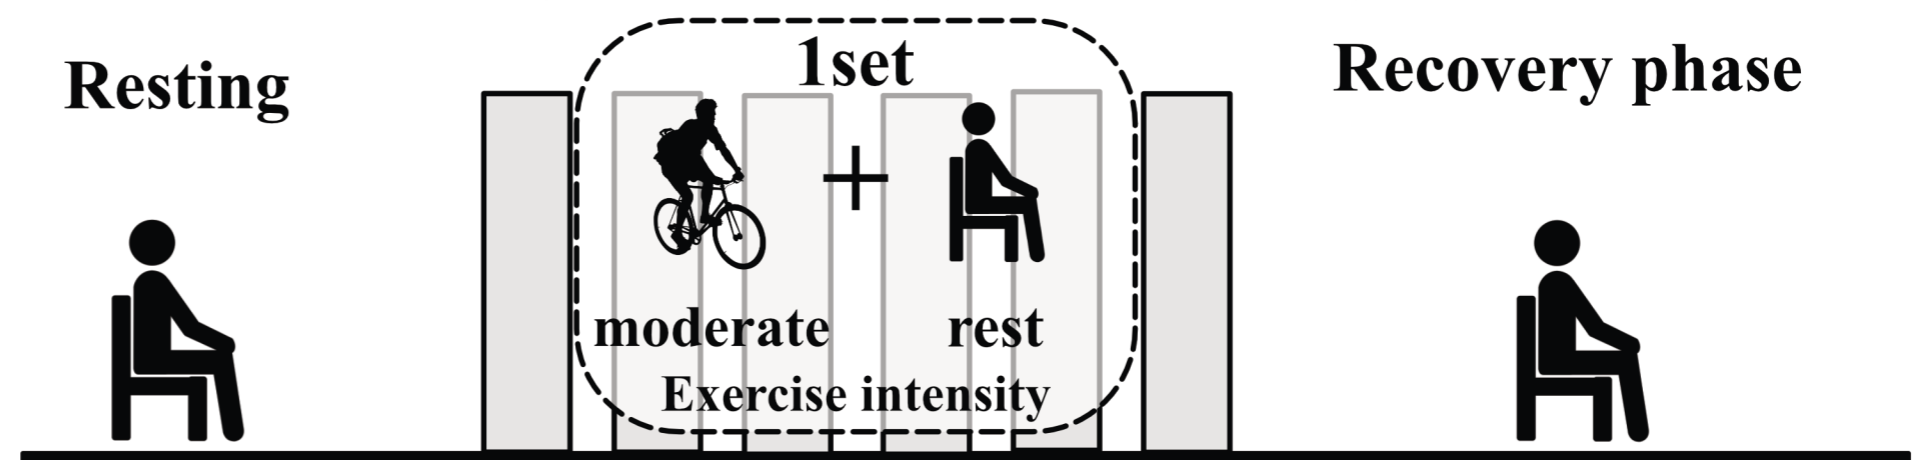

Pre

Post 0

Post 30

Post 60

Renal hemodynamic  
assessment

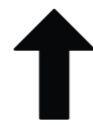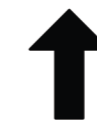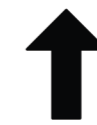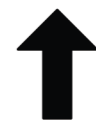

Blood sampling

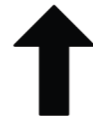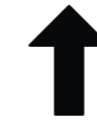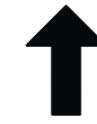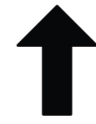

Urine sampling

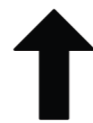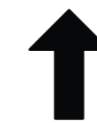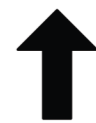

※The above two exercise conditions were performed in random order.



Time:  $p = 0.433$   
Condition:  $p = 0.696$   
Interaction:  $p = 0.073$

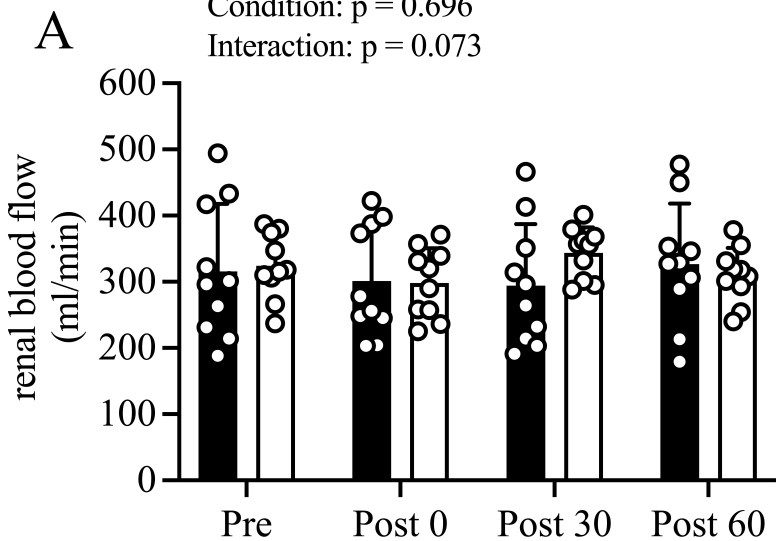

Time:  $p = 0.299$   
Condition:  $p = 0.063$   
Interaction:  $p = 0.298$

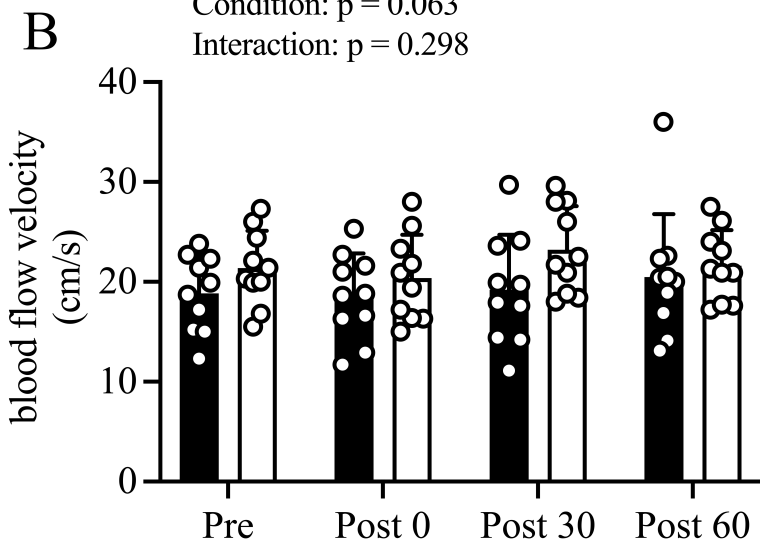

Time:  $p = 0.619$   
Condition:  $p = 0.300$   
Interaction:  $p = 0.551$

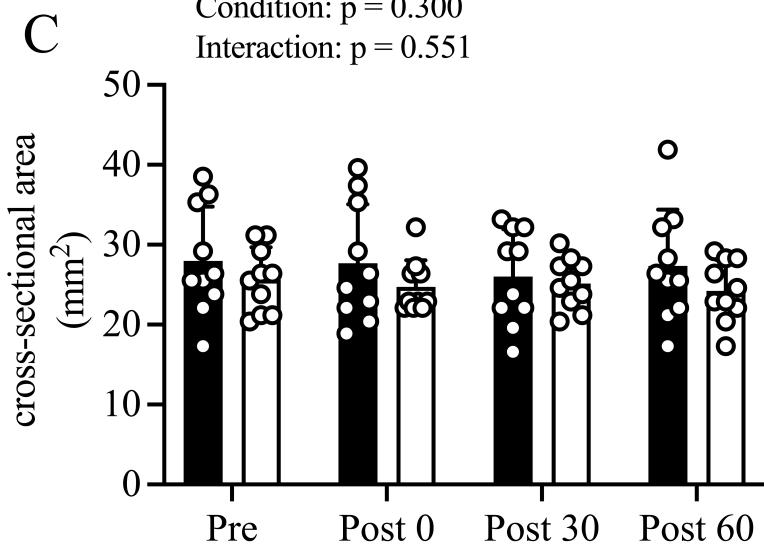

■ MICE □ MIIE

Time:  $p = 0.006$   
Condition:  $p = 0.545$   
Interaction:  $p = 0.095$

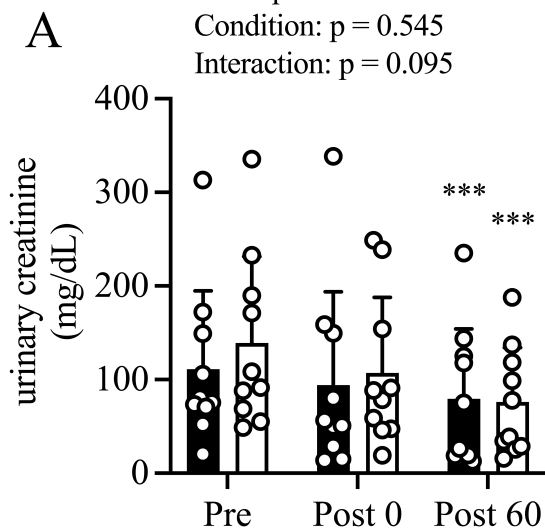

Time:  $p = 0.781$   
Condition:  $p = 0.888$   
Interaction:  $p = 0.349$

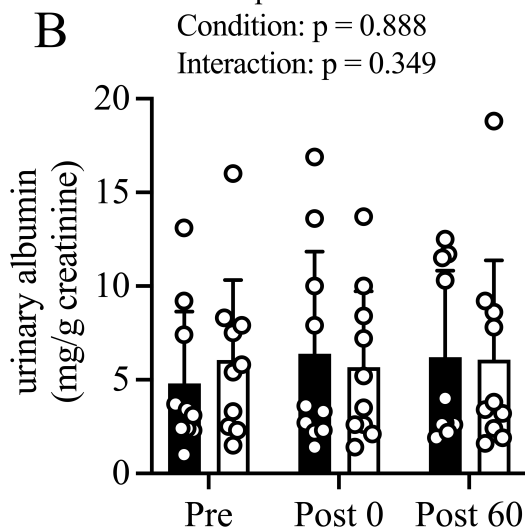

Time:  $p = 0.431$   
Condition:  $p = 0.396$   
Interaction:  $p = 0.161$

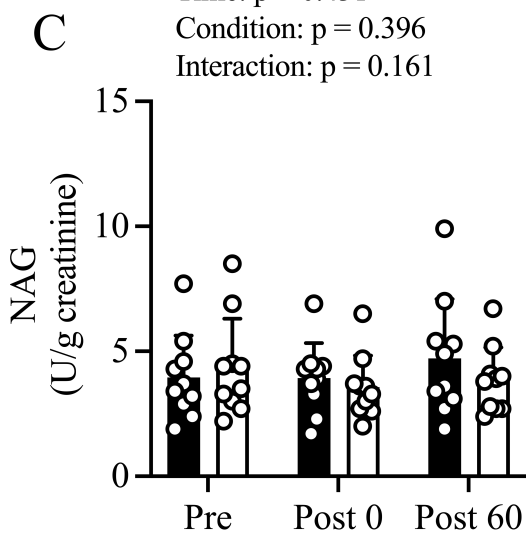

Time:  $p = 0.313$   
Condition:  $p = 0.695$   
Interaction:  $p = 0.696$

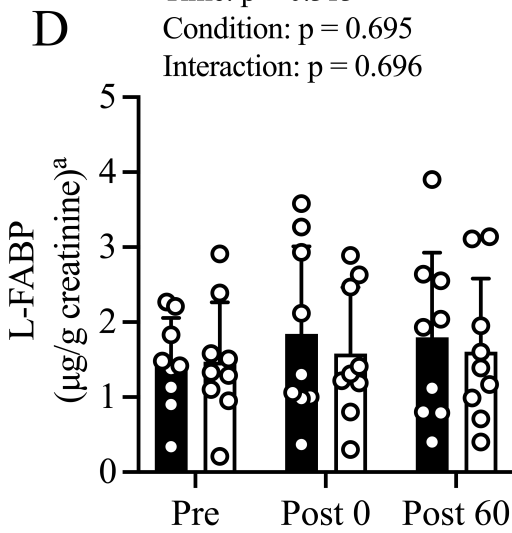

Time:  $p = 0.014$   
Condition:  $p = 0.317$   
Interaction:  $p = 0.169$

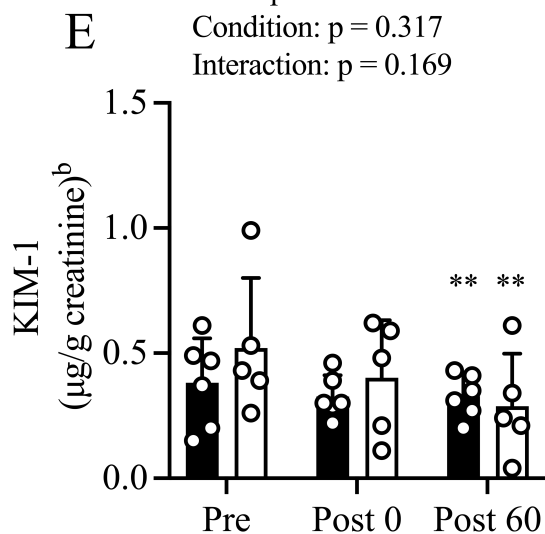

Time:  $p = 0.016$   
Condition:  $p = 0.052$   
Interaction:  $p = 0.692$

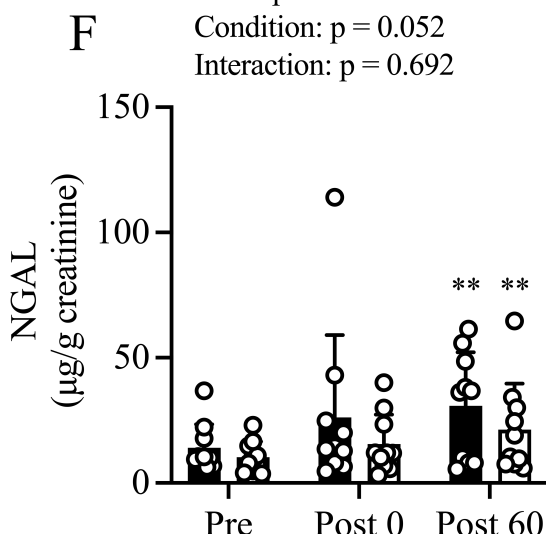

■ MICE □ MIIE

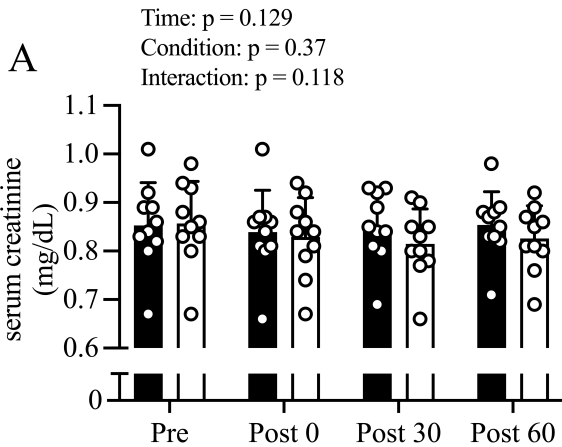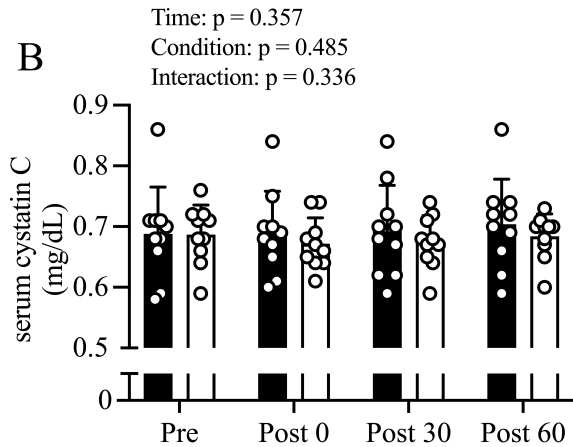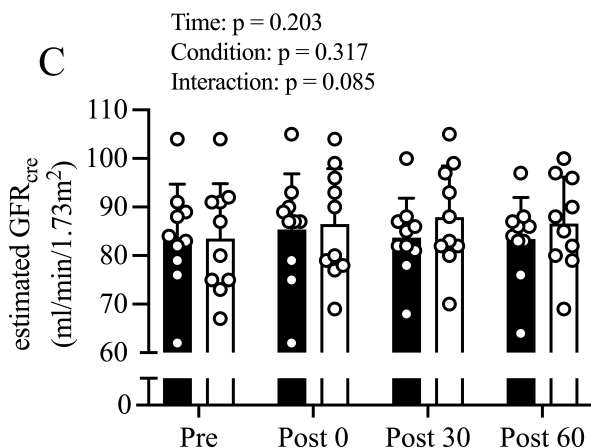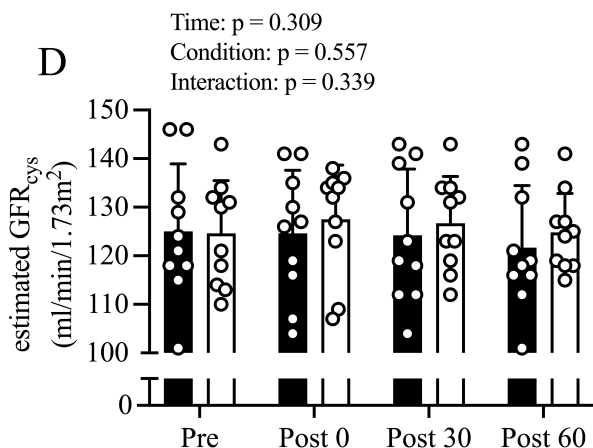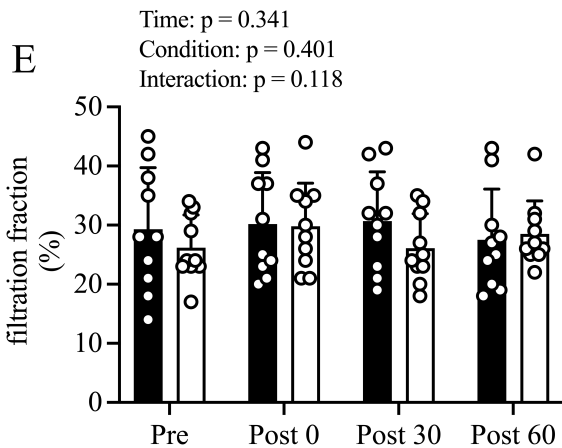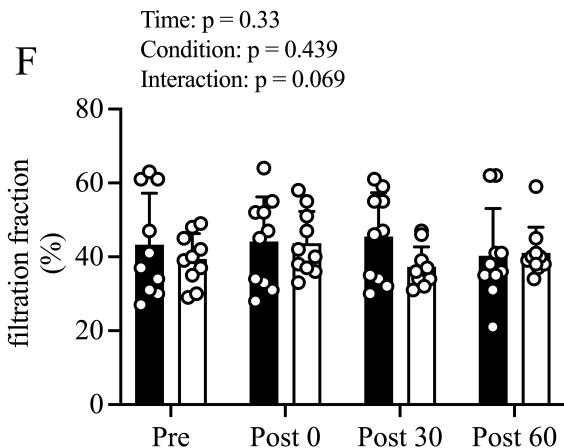

■ MICE □ MIIE

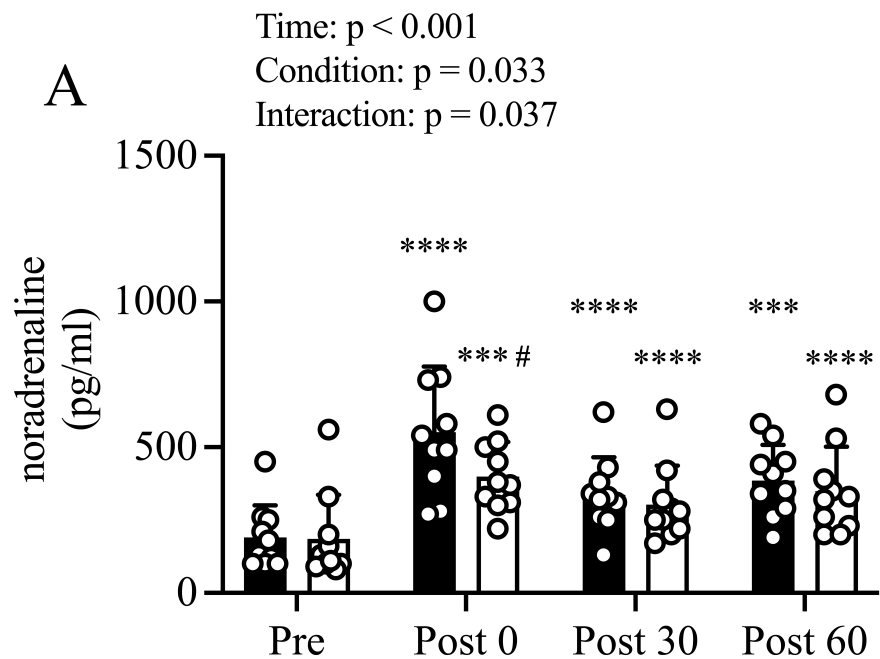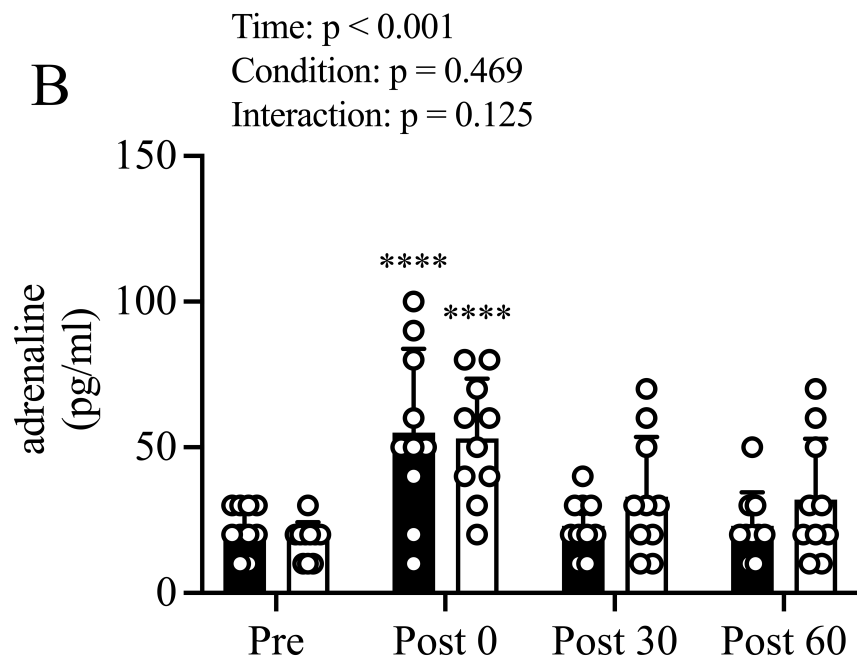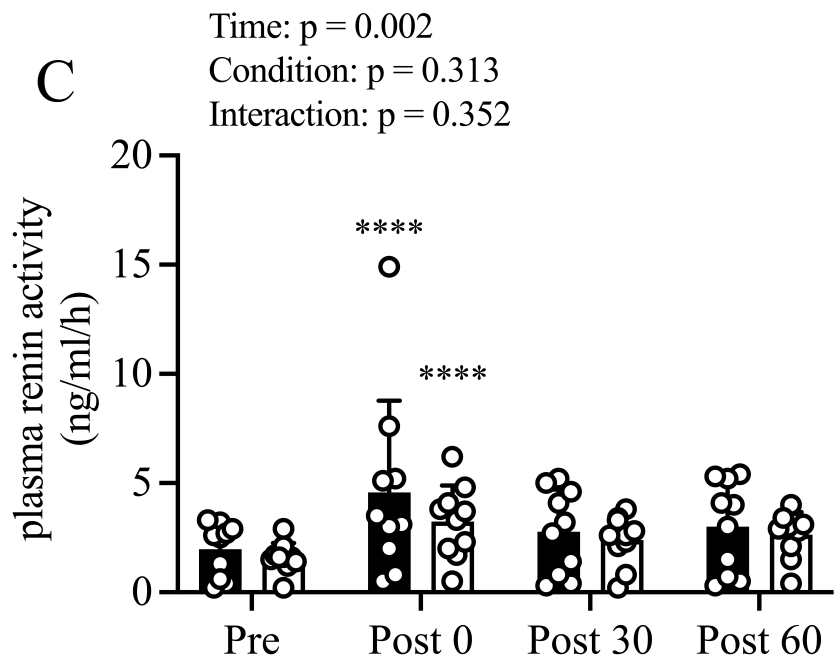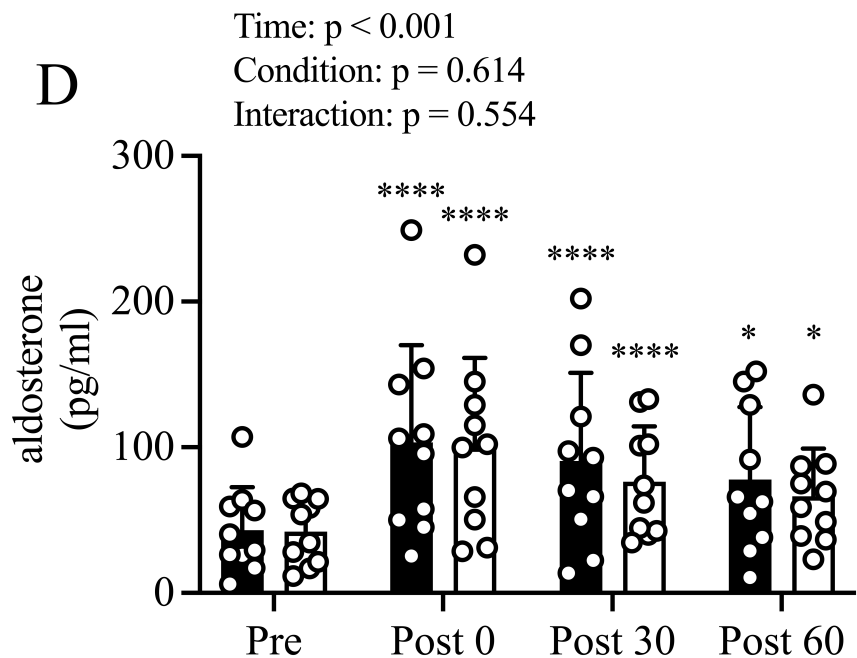

■ MICE □ MIIE
